## Human influences on antipredator behavior in Darwin's finches

Kiyoko M. Gotanda<sup>a\*</sup>

<sup>a</sup> Department of Zoology, University of Cambridge, Cambridge, United Kingdom CB2 3EJ

Telephone: +44 (0) 1223-767130, Fax: +44(0) 1223 336676, Email: [kg419@cam.ac.uk](mailto:kg419@cam.ac.uk)

\* Corresponding author

ORCID ID: <https://orcid.org/0000-0002-3666-0700>

Running Title: Behavior in Darwin's finches

Keywords: Galapagos, invasive predators, flight initiation distance, urbanization, post-eradication

Classification: Biological Sciences – Ecology

1 **Abstract**

2 In the Galapagos, humans have established a permanent presence and have altered selective  
3 pressures through influences such as invasive predators and urbanization. I quantified flight  
4 initiation distance (FID), an antipredator behavior, in Darwin's finches, across multiple islands in  
5 the Galapagos to ask: (i) does antipredator behavior (e.g. FID) change in the presence of invasive  
6 predators and importantly, what happens once they have been eradicated and (ii) to what degree  
7 does urbanization affect antipredator behavior? This is one of the first studies to quantify  
8 behavior in an endemic species after successful eradication of invasive predators. FID was higher  
9 on islands with invasive predators compared to islands with no predators. On islands from which  
10 invasive predators were eradicated ~11 years previously, FID was also higher than on islands  
11 with no invasive predators. Within islands that had both urban and non-urban populations of  
12 finches, FID was lower in urban finch populations, but only above a threshold human population  
13 size. FID in larger urban areas on islands with invasive predators was similar to or *lower* than  
14 FID on islands with no history of invasive predators. Overall, these results suggest that invasive  
15 predators can have a lasting effect on antipredator behavior, even after eradication, and that the  
16 effect of urbanization can strongly oppose the effect of invasive predators, reducing antipredator  
17 behavior to levels lower than found on pristine islands with no human influences. These results  
18 improve our understanding of human influences on antipredator behavior which can help inform  
19 future conservation and management efforts on islands.

20

1 **Significance Statement**

2 Humans are reshaping the selective pressures that organisms experience through urbanization  
3 and the introduction of invasive predators. Invasive predators have been successfully eradicated  
4 on islands, for example in the Galapagos, but we lack a comprehensive understanding of how  
5 endemic species will cope *after* such eradication. Furthermore, we do not fully understand how  
6 much urbanization can counter antipredator adaptations. I found that Darwin's finches maintain  
7 increased antipredator in response to introduced predators even after successful eradication, and  
8 that urbanization can strongly counter such behavioral adaptations by greatly reducing  
9 antipredator behavior in the presence of invasive predators. Human influences can have strong,  
10 counteracting effects on endemic species and their behavioral traits, and these must be  
11 considered in island conservation and management efforts.

12

1 "All of [the terrestrial birds] are often approached sufficiently near to be killed with a  
2 switch, and sometimes, as I myself tried, with a cap or a hat." – Charles Darwin in "The Voyage  
3 of the Beagle"

4

## 5 **Introduction**

6 Human influences such as invasive species and urbanization can strongly affect the process of  
7 local adaptation (1–4). Such effects are amplified on islands such as the Galapagos Islands,  
8 where small population sizes and strong isolation increase the vulnerability of local flora and  
9 fauna to human influences, often resulting in loss of island biodiversity through extinctions (5–  
10 8). Among the endemic species on the Galapagos Islands are Darwin’s finches, an iconic  
11 example of an adaptive radiation in which a single founding species has evolved into several  
12 species, each with different adaptations (e.g. beak shapes and body sizes) to exploit different  
13 ecological niches (9, 10). Humans began establishing settlements on the Galapagos in the early  
14 19<sup>th</sup> century (11), and since then, human influences such as invasive predators and urbanization  
15 have affected several islands on the Galapagos. Many organisms initially respond to such human  
16 influences through behavioral adaptations. Here, I consider how two human influences –  
17 invasive predators and urbanization – might alter antipredator behavior in Darwin’s finches on  
18 the Galapagos Islands.

19 Invasive predators have strong ecological and evolutionary effects (1, 2, 12, 13), and this  
20 impact is known to be correlated with local extinction events (14, 15). On islands, the lack of  
21 predators and correlated relaxed selection can result in reduced antipredator behavior (16–19).  
22 This evolutionary naïveté of isolated animals that have evolved without major predators can  
23 contribute to the extirpation of island species (17, 18, 20, 21). In particular, feral and domestic

24 house cats (*Felis silvestris catus*) are of concern for island biodiversity because cats target small  
25 animals such as birds and reptiles (22–25), and invasive house cats now exist on four islands of  
26 the Galapagos (26), presenting a critical threat for Galapagos biodiversity (27, 28). Past research  
27 on the effects of invasive predators in the Galapagos has focused on behavioral adaptations in  
28 reptiles (e.g., 27, 29), and thus, little is known about the effect of novel mammalian predators on  
29 endemic land birds. Given the resulting selective pressures, natural selection should favor an  
30 increase in antipredator behavior after the introduction of an invasive predator to reduce  
31 mortality.

32       Effective conservation management, especially on islands, often involve eradication of  
33 invasive predators to protect the local and endemic species (30, 31). Post-eradication research  
34 typically follows local and endemic species population recovery (32–34), monitors the re-  
35 introduction of extirpated species to previously abandoned breeding grounds (35), or focus on  
36 major ecological effects such as changes in food web dynamics (32, 36). All this research  
37 contributes to the growing need to understand post-eradication effects (33, 34, 37), yet  
38 surprisingly little research has focused on post-eradication behavioral adaptations, nor how  
39 quickly such behavioral adaptations might occur. Post-eradication behavioral adaptations could  
40 have population-level consequences on fitness. For example, increased antipredator behavior can  
41 have associated costs due to the reallocation of energy and time away from other important  
42 behaviors such as foraging, reproduction, and rearing of young (38–40). Thus, if increased  
43 antipredator behavior is maintained after eradication, this might result in a decrease in fitness for  
44 local and endemic species. Understanding how local and endemic species will behaviorally adapt  
45 post-eradication could help improve conservation efforts. On the Galapagos, some islands have  
46 invasive house cats, some have remained free of invasive predators, and some islands have

47 successfully eradicated invasive predators. This allows for among-island comparisons of  
48 antipredator behavior in relation to the current and historical invasive-predator regime.

49         Urbanization has rapidly increased in the past century, with more than half the world's  
50 population occupying urban settlements, severely altering patterns of selection and adaptation (3,  
51 4, 41). In general, animals such as birds show decreased antipredator behavior in urban areas  
52 compared to rural areas, likely due to habituation to humans (42–45). However, such a reduction  
53 in antipredator behavior in urban areas could make organisms more vulnerable to different  
54 threats, such as invasive predators. Quantifying the degree to which urbanization can reduce  
55 antipredator behaviors can inform our understanding of the impacts of urbanization. Can  
56 urbanization reduce antipredator behavior to levels *before* the introduction of predators?

57         The Galapagos Islands represent an excellent opportunity to study the effects on invasive  
58 predators and urbanization for two key reasons that few, if any, other systems offer. First, few  
59 other archipelagos in the world have islands that vary not only in the presence or absence of  
60 invasive predators, but also have islands that have successfully eradicated invasive predators.  
61 Second, islands differ not only in the presence or absence of urban centers, but also in the size of  
62 the urban centers, representing a novel opportunity to compare antipredator behavior along a  
63 gradient of urbanization as well as among islands that differ in the presence or absence of urban  
64 centers. The isolation of the Galapagos Islands removes potentially confounding factors such as  
65 high gene flow or continued influxes of introduced predators, allowing me to ask two key  
66 questions regarding human influences and antipredator behavior. First, I ask how will  
67 antipredator behavior change in the presence of invasive predators and perhaps more  
68 importantly, what will happen *after* eradication of invasive predators from an island? Very little  
69 research has been done on behavioral adaptations post-eradication. Second, I ask how much can

70 urbanization reduce antipredator behavior – can it be reduced to levels found on islands with no  
71 history of invasive predators? While we know how urbanization can affect behavior, we have no  
72 sense of the *degree* to which urbanization is affecting behavior because it is difficult to find a  
73 system in which we can assess baseline behavior before urbanization occurred (e.g. islands with  
74 no history of permanent human populations). Together, these two questions can inform how  
75 human influences are affecting antipredator behavior on isolated islands.

76

## 77 **Results**

78 *How does antipredator behavior change in the presence of invasive predators and what happens*  
79 *following eradication of invasive predators from an island?*

80 On islands with invasive predators and islands where predators have been eradicated, FID  
81 in finches was significantly higher than on pristine islands (Table 1, Figure 1). Post-hoc  
82 comparisons showed that finches on pristine islands (Santa Fe and Española) had lower FID  
83 when compared to finches on islands with invasive predators (Figure 1;  $p = 0.054$ ) and  
84 eradicated islands (Figure 1;  $p = 0.012$ ), and finches on eradicated islands did not differ in FID  
85 when compared to finches on islands with invasive predators (Figure 1,  $p = 0.179$ ). As group size  
86 increased, FID increased (Table 1, Supplemental Figure 1). Analysis with data only for small  
87 ground finches had comparable results with the only differences being group size was no longer  
88 significantly correlated with FID (Table 1) and a post-hoc comparison of FID from finches on  
89 islands with invasive predators was significantly lower than finches on pristine islands ( $p =$   
90  $0.015$ ). When considering the effect of island independently of invasive-predator regime, island  
91 and group size had a significant effect on FID (Figure 1; Table 2). Post-hoc comparisons of FID  
92 within an invasive-predator regime showed no significant difference in FID between finches on

93 the two pristine islands ( $p = 0.677$ ), among the four islands with invasive predators ( $0.105 < p <$   
94  $0.591$ ) with the exception of finches on Floreana having significantly higher FID than finches on  
95 Santa Cruz ( $p = 0.009$ ). Between the two eradicated islands, finches on Baltra had significantly  
96 higher FID than finches on North Seymour ( $p = 0.010$ ). Analysis with data only for small ground  
97 finches had comparable results with the only differences being group size was no longer  
98 significantly correlated with FID (Table 2) and a post-hoc comparison of FID of islands within a  
99 predation regime found finches on Baltra did not significantly differ from finches on North  
100 Seymour ( $p = 0.996$ ) and finches on Floreana did not differ significantly from finches on Santa  
101 Cruz ( $p = 0.532$ ).

102 *How much can urbanization affect antipredator behavior?*

103 Urban finches had significantly lower FID as compared to non-urban finches (Table 3, Figs. 1  
104 and 2). A post-hoc linear mixed model analyzing FID in finches on Floreana showed no  
105 significant difference between urban and non-urban populations ( $\chi^2 = 0.358$ ,  $p = 0.550$ ) whereas  
106 FID in finches was significantly lower in urban areas as compared to non-urban areas on Isabela  
107 ( $\chi^2 = 19.062$ ,  $p < 0.001$ ), San Cristobal ( $\chi^2 = 28.478$ ,  $p < 0.001$ ), and Santa Cruz ( $\chi^2 = 22.099$ ,  $p <$   
108  $0.001$ ). On San Cristobal, finches in urban populations had lower FID than found on pristine  
109 islands (Figure 1). Group size was positively correlated with FID (Table 3, Supplemental Figure  
110 1), and time of day was also positively correlated with FID (the later in the day it was, the higher  
111 the FID; Table 3, Supplemental Figure 2). Analysis with data only for small ground finches had  
112 comparable results (Table 3) with the only differences being island and time of day no longer  
113 had a significant effect on FID (Table 3).

114

115 **Discussion**



116 *Increased antipredator behavior is maintained after eradication of invasive predators*  
117 Finches exhibited increased antipredator behavior on islands with invasive predators (Table 1;  
118 Figure 1). More interestingly, this increased antipredator behavior was also observed on islands  
119 where invasive predators had been eradicated (in 2003 and 2008, 13 and 8 years prior to data  
120 collection; the mean generation time of finches is one year, by comparison). Since all islands  
121 have naturally occurring local or endemic predators of finches (Supplemental Table 1), this  
122 effect was most likely due to the presence of invasive predators, even after eradication. This is  
123 one of the first studies to show that increased antipredator behavior has been maintained on  
124 islands that have had invasive predators removed. Several possible reasons exist for these  
125 observations, especially the apparent maintenance of elevated FID on eradicated islands. First, it  
126 is possible increased antipredator behavior has evolved on islands that have and used to have  
127 invasive predators. However, without knowledge of heritability, and thus actual evolution, this  
128 cannot be confirmed, but would be an area for future research. Second, perhaps the expected  
129 costs of increased antipredator behavior are not high enough to cause a reversion to pre-predator  
130 levels. Increased FID can have associated costs (38–40), suggesting that if this behavioral  
131 adaptation were costly then finches on eradicated islands would have FID comparable to finches  
132 on pristine islands. It could also be that not enough time has elapsed for reversion in antipredator  
133 behavior. Third cultural transmission of increased FID (62, 63) with learned behavior transmitted  
134 from generation to generation could maintain the increased FID. Lastly, the increase in FID  
135 could be due to something other than predation, which could still be present on eradicated  
136 islands, or that for unknown historical reasons, antipredator behavior on the eradicated islands  
137 have historically been high. The last reason is possible, but it would be a quite a coincidence if

138 the eradicated islands that have this elevated FID for some reason unrelated to predation just  
139 happen to be exactly the islands where predation was introduced and then eradicated.

140         Regardless of the mechanism, the fact that antipredator behavior levels did not revert  
141 post-eradication (when comparing FID on eradicated islands to FID on pristine islands; Figure 1)  
142 has potential consequences for evaluating the efficacy of eradication efforts. Recent studies of  
143 local animal populations post-eradication have focused on demographic parameters such as  
144 population recovery (32–34) or on ecological parameters such as food-web dynamics (32, 36).  
145 However, such phenomena will be influenced by behavioral shifts. For example, increased  
146 antipredator behavior correlates with decreased time and energy for behaviors such as foraging,  
147 courting, defending territories, or caring for offspring (38–40), which could affect population  
148 recovery and/or food-web dynamics. Thus, understanding how the eradication of invasive  
149 predators will affect the behavior of local or endemic animals should be central to future  
150 conservation efforts (33, 34, 37).

151 *Urbanization can decrease antipredator behavior to levels lower than before the introduction of*  
152 *predators*

153 Finches in urban areas had lower FID than finches in non-urban areas, supporting previous  
154 findings (42–45). However, two interesting points are found in this general trend. First, the  
155 *degree* of urbanization appears to determine just how much lower FID is for urban finches when  
156 compared to non-urban finches. Finches in the town of Puerto Velasco Ibarra on Floreana had  
157 the highest FID compared to finches in other towns, and Puerto Velasco Ibarra is also the  
158 smallest town, with a permanent population of only 111 (Supplemental Table 1). The  
159 significantly lower FID of finches in larger towns as compared to non-urban finches suggests an  
160 urbanization “threshold”, such that the degree of urbanization needs to be high enough to exert

161 sufficient selective pressure on finches to drive behavioral adaptation; in short, perhaps Puerto  
162 Velasco Ibarra is simply too small to be an “urban” site for the purposes of finch behavioral  
163 adaptation. The next largest town, Puerto Villamil on Isabela, with a population of 2,164  
164 (Supplemental Table 1), had significantly lower FID than Puerto Velasco Ibarra on Floreana.  
165 Puerto Villamil is still a relatively small town (Supplemental Table 1), showing that the  
166 threshold amount of urbanization sufficient to produce differences in antipredator behavior is not  
167 very high.

168         The second interesting point is that on some islands, urbanization can result in FID that is  
169 *lower* than FID on islands that have never been exposed to predators (Figure 1), even though  
170 urban areas invariably contain invasive predators such as cats and rats. In other words, in some  
171 towns, such as Puerto Baquizo Moreno on San Cristobal, FID has been reduced to levels below  
172 what was observed on islands with no history of invasive predators. Such reductions in FID in  
173 urban finches is likely due to habituation (64–67), suggesting that habituation from urbanization  
174 is so strong that it results in FID lower than the baseline FID quantified on pristine islands,  
175 counteracting any increase in FID due to the presence of invasive predators. This suggests that  
176 the effects of urbanization on organisms can be quite strong, with likely evolutionary and  
177 ecological consequences (3, 4, 68).

#### 178 *Group size and species*

179         For all analyses with all species, FID significantly increased with increasing finch group  
180 size (Supplemental Figure 1). This supports the “many-eyes hypothesis” that detection of  
181 predators occurs earlier in large groups, when the predator is further away, due to the larger  
182 number of individuals watching (38). Because of the unbalanced design with respect to sample  
183 sizes of different species on different islands, and because Darwin’s finches are closely related

184 species (implying statistical non-independence among species), I repeated all analyses with a  
185 subset of the data utilizing FID from the one species, the small ground finch, *Geospiza*  
186 *fuliginosa*. Species did not have a significant effect on FID in any of the main analyses, and these  
187 additional single-species results did not alter the interpretation of any of my results. Future work  
188 should use a more balanced sample size and to allow adjustment for non-independence among  
189 species.

## 190 *Conclusions*

191 Our current understanding of how humans affect the evolution and ecology of Darwin's finches  
192 has primarily focused on beak shape evolution and shifts in ecological niches in response to  
193 changes in food availability and diet (69–71). However, humans have had further effects on the  
194 environment of the Galapagos through the creation of urban environments and the introduction  
195 of invasive mammalian predators. The Galapagos Islands represent an opportune system to study  
196 the effects of human influences due to the among island differences in invasive-predator regime  
197 as well as the differences in the amount of urbanization. Such systems do not readily exist  
198 elsewhere. Here, I showed how antipredator behavior increased in response to invasive predators  
199 and was maintained even after eradication of those invasive predators, and this can have possible  
200 demographic and ecological effects. This is one of the first studies to look at post-eradication  
201 behaviors in local and endemic species, which can have implications for future conservation  
202 efforts. I also found that urbanization can reduce antipredator behavior to levels at or below what  
203 was found on pristine islands, attesting to the strength of the effect urbanization can have on  
204 behavioral traits. Understanding the effects of different human influences will help us predict  
205 how organisms might respond to their rapidly changing environments.

206

207 **Materials and methods**

208 *Site descriptions*

209 The Galapagos Islands are a volcanic archipelago located ~1,000 km off the coast of Ecuador.  
210 Local or endemic predators such as owls or snakes are found on all islands (Supplemental Table  
211 1; Swash & Still 2005). Snakes are thought to prey on the nestlings of ground finches, and are  
212 thus an unlikely predator. However, short-eared owls, found on all islands surveyed in this study,  
213 are known predators of adult land birds such as Darwin's finches (47). Galapagos Hawks, also  
214 predators of ground finches (48, 49), are found on four (Santa Fe, Española, Isabela, and Santa  
215 Cruz) of the eight islands surveyed in this study (46, 50). Unfortunately, little data are available  
216 about the current densities of local and endemic predators on these islands; however, the ecology  
217 of the local and endemic predators (e.g. owls) is well documented, and can thus be assumed to be  
218 predators of finches. The invasive-predator regime (presence of house cats) on the islands  
219 (Supplemental Table 1) were classified as: present (Floreana, Isabela, San Cristobal, Santa Cruz),  
220 pristine (Santa Fe, Española), or successful eradication (Baltra, North Seymour). House cats and  
221 rodents were successfully eradicated from Baltra in 2003 (26, 51), and rats from North Seymour  
222 in 2008 (52, 53); I will refer to these as "eradicated" below for brevity. The two pristine islands  
223 and two eradicated islands have no permanent human populations. On the four islands with  
224 human populations (Floreana, Isabela, San Cristobal, Santa Cruz), site urbanization categories  
225 were classified as: urban (in town) or non-urban (remote areas several kilometers away from  
226 town and not visited by tourists). Islands with permanent human populations and no presence of  
227 invasive predators nor pristine islands with permanent human populations exist in the Galapagos  
228 archipelago, and thus, I am restricted to the among island comparisons outlined above.

229

230 *Data collection*

231 Flight initiation distance (FID), the distance at which a prey flees an approaching  
232 predator, is a metric used to quantify antipredator behavior (38–40). An individual’s decision to  
233 flee is influenced by the perceived costs and benefits of remaining or taking flight, which means  
234 FID can be an indicator of how an organism assesses risk, and thus, antipredator behavior. Data  
235 were collected from 2015 to 2018 on eight islands of the Galapagos archipelago, generally  
236 between February and April (some data on San Cristobal were collected in November 2017).

237 FID measurements were performed with a human stimulus following methods from  
238 Blumstein (54). A focal finch was located by walking and searching the landscape at a slow  
239 walking pace, and the finch’s initial behavior was noted. To minimize the possibility of  
240 pseudoreplication, in a given day, each trial ensured the focal finch was of a different sex,  
241 species, or age class (for male *Geospiza spp.*) than finches that had previously been approached.  
242 However, it is possible the same bird might have been approached on different days or years  
243 because the finches were not individually banded. Birds were located in areas that had relatively  
244 open habitat to ensure a straight approach by the human and a clear sightline from the human to  
245 the finch. The human would then approach the focal finch at a standardized speed (~2.2 m/s).  
246 Human stimuli always wore neutral-colored clothing, and looked at the focal individual while  
247 approaching.

248 Flight was considered to have been initiated if the finch extended its wings and flew; the  
249 distance flown could be short (<0.5 m) or substantial (out of sight). Finches that hopped away  
250 instead of taking flight were omitted from the study, though this was a rare occurrence. A marker  
251 was placed where the finch originally was and where the stimulus was when the finch took  
252 flight, and the distance between these markers was the FID. Because of the complexity of the

253 landscape, the distance at which the stimulus started from could not be standardized (54–56), and  
254 so I noted the distance from where the human started to the flight-initiation marker (starting  
255 distance). Alert distance, the distance at which an individual is aware of the approaching  
256 stimulus (57), could not be quantified because the focal individual was often foraging on the  
257 ground and would repeatedly raise its head, and so normal foraging behavior was  
258 indistinguishable from an alert reaction to an approaching human.

259 Each data point collected included the island, invasive-predator regime, urbanization  
260 category (on islands with permanent human populations), finch species and sex, time of day, and  
261 group size (was the focal finch in a group and if so, how large was the group). Finch sex was  
262 identified by plumage, and for ambiguous cases and non-sexually dimorphic species (e.g.  
263 warbler finches), sex was denoted as unknown. Time of day was noted because birds are most  
264 active at dawn and at dusk, so baseline activity levels and behaviors can vary throughout the day.  
265 Group size was noted because it could increase FID because larger groups mean more observers  
266 and thus, detection of a potential threat will occur when the threat is still a longer distance away  
267 (38). Conversely, group size could decrease FID through the dilution effect where the probability  
268 a predator will target a specific individual decreases as group size increases (40). Island size was  
269 also noted (58) to account for potential among island environmental differences due to different  
270 area.

271

### 272 *Statistical analysis*

273 All analyses were done in R (version 3.4.3). To meet assumptions of normal distributions, FID  
274 and starting distance (the distance between the focal finch and the stimulus starting position)  
275 were log-transformed. Then, FID and starting distance were centered by subtracting the mean

276 from each value and then dividing by the standard deviation. Because starting distance could not  
277 be standardized and is known to affect FID, it was included as a covariate, as was group size,  
278 time of day, and island size. Lastly, sex was included as a fixed effect and species and island was  
279 included as a random effect. Sample sizes for some species across islands were unbalanced  
280 (Supplemental Table 2); therefore, I also repeated all analyses using one species, *Geospiza*  
281 *fuliginosa*, the small ground finch. Further analysis details are below, but in general, linear mixed  
282 models were performed using `lmer()` from the `lme4` package (59) and `Anova()` from the `car`  
283 package (60). Random-effect significance (species and/or island) was determined with `ranova()`,  
284 and post-hoc pairwise comparisons for fixed factors in the linear mixed models used  
285 `diffsmeans()`, both from the `lmerTest` package (61).  $R^2$  values were calculated with the  
286 `r.squaredGLMM()` from the `MuMIn` package (version 1.42.1).

287 *How does antipredator change in the presence of invasive predators and what happens following*  
288 *eradication of invasive predators from an island?*

289 On islands that had both urban and non-urban populations, only data from non-urban sites  
290 were used for this analysis. A linear mixed model was performed with invasive-predator regime  
291 and sex as a fixed factor, island and species as random factors, and time of day, starting distance,  
292 island size, and group size as covariates; post-hoc comparisons focused on pairwise comparisons  
293 between invasive-predator regimes. This analysis was performed twice, once with all finch  
294 species, and once with only small ground finches. The interaction between invasive-predator  
295 regime and sex was non-significant for both analyses and was removed.

296 To determine whether FID varied among islands within a given invasive-predator regime,  
297 I ran a linear mixed model with island and sex as fixed factors, species as a random factor, and  
298 time of day, starting distance, and group size as covariates; post-hoc comparisons were focused



299 on pairwise comparisons between islands within a given invasive-predator regime. This analysis  
300 was repeated as a linear model with only small ground finches. The interaction between island  
301 and sex was non-significant for both analyses and was removed. A Tukey's HSD (honestly  
302 significant difference) test was used for post-hoc comparisons for this analysis.

303 *How much can urbanization affect antipredator behavior?*

304 Only data collected from the four islands with permanent populations were used for this analysis.  
305 A linear mixed model was performed with site urbanization and sex as fixed factors, island and  
306 species as random factors, and time of day, starting distance, island size, and group size as  
307 covariates. This analysis was performed twice, once with all finch species, and once with only  
308 small ground finches. The interaction between invasive-predator regime and sex was non-  
309 significant for both analyses and was removed. To look at within island differences in FID  
310 among urban and non-urban finches, for each island, a linear mixed model was performed with  
311 the same factors as above without island as a random factor.

312

### 313 **Acknowledgements**

314 I wish to thank Marc-Olivier Beausoleil, Lara Bernasconi, Carlos Camacho, Sofia Carvajal,  
315 Angela Hansen, C elina Leuba, and Ashley Saulsberry for their assistance in the field. Permits  
316 were obtained with the assistance of Sofia Carvajal, Jaime Chaves, Jeff Podos, the Charles  
317 Darwin Research Centre, the Gal apagos Science Centre, the Gal apagos National Park, and the  
318 Universidad de San Francisco. I thank Sarah Knutie for numerous helpful suggestions on ideas  
319 and methods, Ben Haller, Andrew Hendry, and Claire Spottiswoode for extensive comments and  
320 friendly reviews of the manuscript, and Tom Houslay for guidance with statistics. My research  
321 has been generously supported by the Natural Sciences and Engineering Research Council of

322 Canada (Banting Postdoctoral Fellowship), Le Fonds Québécois de la Recherche sur la Nature et  
323 les Technologies (postdoctoral research fellowship), Clare Hall (Whitehead Fund), Christ's  
324 College (Galápagos Islands Visiting Scholarship Scheme), Newnham College (Phyllis and  
325 Eileen Gibbs Travelling Research Fellowship), the British Ornithologists' Union, and McGill  
326 University (Department of Biology Vineberg Fellowship). Lastly, many thanks to Andrew  
327 Hendry, Jeff Podos, and Joost Raeymaekers for introducing me to the magical place that  
328 happened to be visited, some 185 years ago, by someone named Charles Darwin.

## References

1. Low T (2002) *Feral Future: The Untold Story of Australia's Exotic Invaders* (University of Chicago Press, Chicago).
2. Vitousek PM, Mooney HA, Lubchenco J, Melillo JM (1997) Human domination of Earth's ecosystems. *Science* 277(5325):494–499.
3. Johnson MTJ, Munshi-South J (2017) Evolution of life in urban environments. *Science* 358(607):eaam8237.
4. Alberti M, et al. (2017) Global urban signatures of phenotypic change in animal and plant populations. *Proc Natl Acad Sci* 114(34):8651–8956.
5. Sax DF, Gaines SD (2008) Species invasions and extinction: the future of native biodiversity on islands. *Proc Natl Acad Sci* 105(Supplement 1):11490–11497.
6. Blackburn TM, Cassey P, Duncan RP, Evans KL, Gaston KJ (2004) Avian extinction and mammalian introductions on oceanic islands. *Science* 305(5692):1955–1958.
7. Fritts TH, Rodda GH (1998) The role of introduced species in the degradation of island ecosystems: a case history of Guam. *Annu Rev Ecol Syst* 29(1):113–140.
8. MacArthur RH, Wilson EO (1967) *The Theory of Island Biogeography* (Princeton University Press, Princeton, N. J.).
9. Grant PR, Grant RB (2008) *How and Why Species Multiply: The Radiation of Darwin's Finches* (Princeton University Press, Princeton, New Jersey, USA).
10. Grant PR, Grant RB (2014) *40 Years of Evolution: Darwin's Finches on Daphne Major Island* (Princeton University Press, Princeton, New Jersey, USA).
11. Fitter J, Fitter D, Hosking D (2016) *Wildlife of the Galápagos* (Princeton University Press, Princeton, New Jersey). 2nd Ed.

12. Clavero M, Brotons L, Pons P, Sol D (2009) Prominent role of invasive species in avian biodiversity loss. *Biol Conserv* 142(10):2043–2049.
13. Lever C (1994) *Naturalized Animals: The Ecology of Successfully Introduced Species* (Poyser Natural History, London).
14. McKinney ML, Lockwood JL (1999) Biotic homogenization: a few winners replacing many losers in the next mass extinction. *Trends Ecol Evol* 14(11):450–453.
15. Clavero M, García-Berthou E (2005) Invasive species are a leading cause of animal extinctions. *Trends Ecol Evol* 20(3):110.
16. Beauchamp G (2004) Reduced flocking by birds on islands with relaxed predation. *Proc R Soc B Biol Sci* 271(1543):1039–1042.
17. Blumstein DT, Daniel JC, Springett BP (2004) A test of the multi-predator hypothesis: rapid loss of antipredator behavior after 130 years of isolation. *Ethology* 110(11):919–934.
18. Blumstein DT (2002) Moving to suburbia: ontogenetic and evolutionary consequences of life on predator-free islands. *J Biogeogr* 29(5–6):685–692.
19. Jolly CJ, Webb JK, Phillips BL (2018) The perils of paradise: an endangered species conserved on an island loses antipredator behaviors within 13 generations. *Biol Lett* 14:20180222.
20. Cooper WE, Pyron RA, Garland T (2014) Island tameness: living on islands reduces flight initiation distance. *Proc R Soc B Biol Sci* 281(1777):20133019.
21. Blumstein DT, Daniel JC (2005) The loss of anti-predator behavior following isolation on islands. *Proc R Soc B Biol Sci* 272(1573):1663–1668.
22. Loss SR, Will T, Marra PP (2013) The impact of free-ranging domestic cats on wildlife of the United States. *Nat Commun* 4:2961.

23. Blancher P (2013) Estimated number of birds killed by house cats (*Felis catus*) in Canada. *Avian Conserv Ecol* 8(2):3.
24. Woods M, McDonald RA, Harris S (2003) Predation of wildlife by domestic cats *Felis catus* in Great Britain. *Mammal Rev Blackwell Sci* 33(33):174–188.
25. Woinarski JCZ, et al. (2018) How many reptiles are killed by cats in Australia? *Wildl Res* 45(3):247–266.
26. Phillips RB, Wiedenfeld DA, Snell HL (2012) Current status of alien vertebrates in the Galápagos Islands: invasion history, distribution, and potential impacts. *Biol Invasions* 14(2):461–480.
27. Stone PA, Snell HL, Snell HM (1994) Behavioral diversity as biological diversity: introduced cats and lava lizard wariness. *Conserv Biol* 8(2):569–573.
28. Wiedenfeld DA, Jiménez-Uzcátegui (2008) Critical problems for bird conservation in the Galápagos Islands. *Cotinga* 29:22–27.
29. Berger S, Wikelski M, Romero LM, Kalko EK, Roedl T (2007) Behavioral and physiological adjustments to new predators in an endemic island species, the Galápagos marine iguana. *Horm Behav* 52(5):653–663.
30. Nogales M, et al. (2013) Feral cats and biodiversity conservation: the urgent prioritization of island management. *Bioscience* 63(10):804–810.
31. Jones HP, et al. (2016) Invasive mammal eradication on islands results in substantial conservation gains. *Proc Natl Acad Sci* 113(15):4033–4038.
32. Hughes BJ, Martin GR, Reynolds SJ (2008) Cats and seabirds: effects of feral domestic cat *Felis silvestris catus* eradication on the population of Sooty Terns *Onychoprion fuscata* on Ascension Island, South Atlantic. *Ibis (Lond 1859)* 150:122–131.

33. Lavers JL, Wilcox C, Donlan CJ (2010) Bird demographic responses to predator removal programs. *Biol Invasions* 12(11):3839–3859.
34. Côté IM, Sutherland WJ (1997) The effectiveness of removing predators to protect bird populations. *Conserv Biol* 11(2):395–405.
35. Campbell KJ, et al. (2011) Review of feral cat eradication on islands. *Island Invasives: Eradication and Management*, eds Veitch CR, Clout MN, Towns DR (IUCN and CBB, Sitzerland and New Zealand).
36. Zavaleta ES, Hobbs RJ, Mooney HA (2001) Viewing invasive species removal in a whole-ecosystem context. *Trends Ecol Evol* 16(8):454–459.
37. Phillips RA (2010) Eradications of invasive mammals from islands: Why, where, how and what next? *Emu* 110(4). doi:10.1071/MUv110n4\_ED.
38. Ydenberg RC, Dill LM (1986) The economics of fleeing from predators. *Adv Study Behav* 16:229–249.
39. Cooper WE, Frederick WG (2007) Optimal flight initiation distance. *J Theor Biol* 244(1):59–67.
40. Cooper WE, Blumstein DT eds. (2015) *Escaping From Predators: An Integrative View of Escape Decisions* (Cambridge University Press, Cambridge, UK).
41. Hendry AP, Gotanda KM, Svensson EI (2017) Human influences on evolution, and the ecological and societal consequences. *Philos Trans R Soc B* 372(1712):20160028.
42. Díaz M, et al. (2013) The geography of fear: a latitudinal gradient in anti-predator escape distances of birds across Europe. *PLoS One* 8(5):e64634.
43. Samia DSM, et al. (2017) Rural-urban differences in escape behavior of European birds across a latitudinal gradient. *Front Ecol Evol* 5(June):1–13.

44. Møller AP, Tryjanowski P (2014) Direction of approach by predators and flight initiation distance of urban and rural populations of birds. *Behav Ecol* 25(4):960–966.
45. Møller AP (2009) Successful city dwellers: a comparative study of the ecological characteristics of urban birds in the Western Palearctic. *Oecologia* 159:849–858.
46. Swash A, Still R (2005) *Birds, Mammals, and Reptiles of the Galápagos Islands - An Identification Guide* (Yale University Press, New Haven). 2nd Ed.
47. Groot RSDE (1982) Origin, status and ecology of the owls in Galapagos. *Ardea* 71:167–182.
48. Vries T De (1976) Prey selection and hunting methods of the Galapagos Hawk, *Buteo galapagoensis*. *Le Gerfaut* 66:3–43.
49. Vries T De (2015) *The Galapagos Hawk/El gavián de Galápagos* (Tundra Ediciones, Castellón). Monografía.
50. Vries T De (1989) Conservation, Status and Ecological Importance of the Galapagos Hawk *Buteo galapagoensis*. *Raptors in the Modern World*, eds Meyburg B-U, Chancellor RD (WWGBP, Berlin, London, & Paris), pp 327–330.
51. Phillips RB, et al. (2005) Eradicating feral cats to protect Galapagos Land Iguanas: methods and strategies. *Pacific Conserv Biol* 11(4):257–267.
52. Harper GA, Carrión V (2011) Introduced rodents in the Galapagos: colonisation, removal and the future. *Island Invasives: Eradication and Management*, eds Veitch CR, Clout MN, Towns DR (IUCN, Gland, Switzerland), pp 63–66.
53. Carrión V, Sevilla C, Tapia W (2008) Management of introduced animals in Galapagos. *Galapagos Res* 65:46–48.
54. Blumstein DT (2006) Developing an evolutionary ecology of fear: how life history and

- natural history traits affect disturbance tolerance in birds. *Anim Behav* 71:389–399.
55. Blumstein DT (2003) Flight-initiation distance in birds is dependent on intruder starting distance. *J Wildl Manage* 67:852–857.
56. Samia DSM, Nomura F, Blumstein DT (2013) Do animals generally flush early and avoid the rush? A meta-analysis. *Biol Lett* 9(2):20130016–20130016.
57. Cooper WE, Samia DSM, Blumstein DT (2015) FEAR, Spontaneity, and Artifact in Economic Escape Theory: A Review and Prospectus. *Advances in the Study of Behavior*, pp 147–197.
58. Jackson MH (1991) *Galapagos* (The University of Calgary Press, Calgary).
59. Bates DM, Maechler M, Bolker BM, Walker S (2015) Fitting linear mixed-effects models using lme4. *J Stat Softw* 67(1):1–48.
60. Fox J, Weisberg S (2011) *An {R} Companion to Applied Regression* (Sage, Thousand Oaks, CA). Second Available at:  
<http://socserv.socsci.mcmaster.ca/jfox/Books/Companion>.
61. Kuznetsova A, Brockhoff PB, Christensen RHB (2017) lmerTest package: tests in linear mixed effects models. *J Stat Softw* 82(13):1–26.
62. Aplin LM (2018) Culture and cultural evolution in birds: a review of the evidence. *Anim Behav*. doi:10.1016/j.anbehav.2018.05.001.
63. Aplin LM, et al. (2015) Experimentally induced innovations lead to persistent culture via conformity in wild birds. *Nature* 518(7540):538–541.
64. Cavalli M, Baladrón AV, Isacch JP, Biondi LM, Bó MS (2018) The role of habituation in the adjustment to urban life: An experimental approach with burrowing owls. *Behav Processes* 157(September):250–255.



65. Møller AP (2008) Flight distance of urban birds, predation, and selection for urban life. *Behav Ecol Sociobiol* 63:63–75.
66. Samia DSM, Nakagawa S, Nomura F, Rangel TF, Blumstein DT (2016) Increased tolerance to humans among disturbed wildlife. *Nat Commun* 6(1):1–8.
67. Blumstein DT, Fernandez-Juricic E, Zollner PA, Garity SC (2005) Inter-specific variation in avian responses to human disturbance. *J Appl Ecol* 42(5):943–953.
68. Alberti M (2015) Eco-evolutionary dynamics in an urbanizing planet. *Trends Ecol Evol* 30(2):114–126.
69. De León LF, et al. (2018) Urbanization erodes niche segregation in Darwin’s finches. *Evol Appl* (May):1–15.
70. De León LF, et al. (2011) Exploring possible human influences on the evolution of Darwin’s finches. *Evolution* 65(8):2258–2272.
71. Hendry AP, et al. (2006) Possible human impacts on adaptive radiation: beak size bimodality in Darwin’s finches. *Proc R Soc B Biol Sci* 273(1596):1887–1894.

Table 1. Results looking at the effects of invasive predator regime (present, pristine, or eradicated) on flight initiation distance (FID)? A general linear mixed model was performed with FID as the dependent variable, invasive-predator regime and sex as fixed factors, time of day, starting distance, island size, and finch group size as covariates, and species and island as random factors.  $R^2$  for full model with all species was 0.282. This analysis was repeated using only small ground finches. Data used for this analysis were from eight islands that varied in invasive-predator regime. For data collected on islands with permanent human populations, only data from non-urban sites used here. Bold indicates significant P values.

|                           |                | $\chi^2$ | d.f. | P                |
|---------------------------|----------------|----------|------|------------------|
| All finches               | Predation      | 17.583   | 2    | <b>&lt;0.001</b> |
|                           | Sex            | 2.58     | 2    | 0.274            |
|                           | Time of Day    | 1.848    | 1    | 0.174            |
|                           | Start Distance | 0.345    | 1    | 0.557            |
|                           | Group Size     | 18.297   | 1    | <b>&lt;0.001</b> |
|                           | Island Size    | 0.151    | 1    | 0.698            |
|                           | Species        | 0.000    | 1    | 1.000            |
|                           | Island         | 5.200    | 1    | <b>0.023</b>     |
| Small ground finches only | Predation      | 16.614   | 2    | <b>&lt;0.001</b> |
|                           | Sex            | 3.644    | 2    | 0.162            |
|                           | Time of Day    | 1.455    | 1    | 0.228            |
|                           | Start Distance | 0.003    | 1    | 0.960            |
|                           | Group Size     | 1.494    | 1    | 0.221            |
|                           | Island Size    | 0.412    | 1    | 0.521            |
|                           | Island         | 0.187    | 1    | 0.666            |

Table 2. Results looking at the effect of islands on flight initiation distance (FID). A linear mixed model was performed with FID as the dependent variable, island and sex as fixed factors, species as a random factor, and time of day, starting distance, and group size as covariates.  $R^2$  for full model with all species was 0.245. This analysis was repeated as a linear model with only small ground finches. Data used for this analysis were from eight islands that varied in invasive-predator regime. On islands with human populations, only data from non-urban sites are included. Bold indicates significant P values.

|                           |                | $\chi^2$ | d.f. | P                |
|---------------------------|----------------|----------|------|------------------|
| All finches               | Island         | 61.041   | 7    | <b>&lt;0.001</b> |
|                           | Sex            | 2.287    | 2    | 0.319            |
|                           | Time of Day    | 2.437    | 1    | 0.119            |
|                           | Start Distance | 0.409    | 1    | 0.522            |
|                           | Group Size     | 18.852   | 1    | <b>&lt;0.001</b> |
|                           | Species        | <0.001   | 1    | 1.000            |
|                           |                |          | F    | d.f.             |
| Small ground finches only | Island         | 3.654    | 7    | <b>0.001</b>     |
|                           | Sex            | 1.709    | 2    | 0.185            |
|                           | Time of Day    | 1.817    | 1    | 0.180            |
|                           | Start Distance | 0.041    | 1    | 0.840            |
|                           | Group Size     | 1.908    | 1    | 0.169            |

Table 3. Results looking at the effect of urbanization on flight initiation distance (FID). A general linear mixed model was performed with FID as the dependent variable, site urbanization category and sex as fixed factors, time of day, starting distance, island size, and group size as covariates, and species and island as random factors.  $R^2$  for full model was 0.276. This analysis was repeated using only small ground finches. Data used in this analysis were from urban and non-urban sites on the four islands with permanent human populations. Bold indicates significant P values.

|                           |                   | $\chi^2$ | d.f. | P                |
|---------------------------|-------------------|----------|------|------------------|
| All finches               | Site Category     | 70.077   | 1    | <b>&lt;0.001</b> |
|                           | Sex               | 0.128    | 2    | 0.938            |
|                           | Time of Day       | 11.384   | 1    | <b>0.001</b>     |
|                           | Starting Distance | 0.444    | 1    | 0.505            |
|                           | Group Size        | 13.159   | 1    | <b>&lt;0.001</b> |
|                           | Island Size       | 0.681    | 1    | 0.409            |
|                           | Species           | 0.000    | 1    | 1.000            |
|                           | Island            | 3.963    | 1    | <b>0.047</b>     |
| Only small ground finches | Site Category     | 42.910   | 1    | <b>&lt;0.001</b> |
|                           | Sex               | 0.031    | 1    | 0.861            |
|                           | Time of Day       | 2.275    | 1    | 0.131            |
|                           | Starting Distance | 1.939    | 1    | 0.164            |
|                           | Group Size        | 5.124    | 1    | <b>0.024</b>     |
|                           | Island Size       | 0.121    | 1    | 0.728            |
|                           | Island            | 2.495    | 1    | 0.114            |

## Figure Legends

Figure 1. Mean FID and standard error on the eight islands data were collected from. Symbol shape denotes the invasive-predator regime (pristine, eradicated, or present). Island and site categorization are listed on the top, and numbers indicate sample sizes. Symbol color indicates the site urbanization category on the four islands with permanent human populations and invasive predators (Floreana, Isabela, San Cristobal, and Santa Cruz). Grey color indicates non-urban finches, and black indicates urban finches. Open symbols indicate islands with no permanent human populations. The two far left islands, Española and Santa Fe are pristine islands with no history of invasive predators. The next two islands, Baltra and North Seymour are where invasive predators have been successfully eradicated in 2003 and 2008 respectively, and show maintained increased antipredator behavior. Islands with predators are ordered by population size with Floreana having the smallest urban population and Santa Cruz the largest urban population. In non-urban sites that have invasive predators, antipredator behavior is increased, and in non-urban sites, antipredator is significantly decreased on all islands except Floreana. On San Cristobal, the antipredator behavior is lower than on islands untouched by invasive predators and humans.

Figure 2. Mean FID and standard error contrasting urban finches with non-urban finches from the four islands that have permanent human populations. Color indicates island. Above the 1:1 line indicates FID in non-urban areas is higher than FID in urban areas. Floreana, the island with the smallest human population size, has the least difference in FID between urban and non-urban finches.

Figure 1.

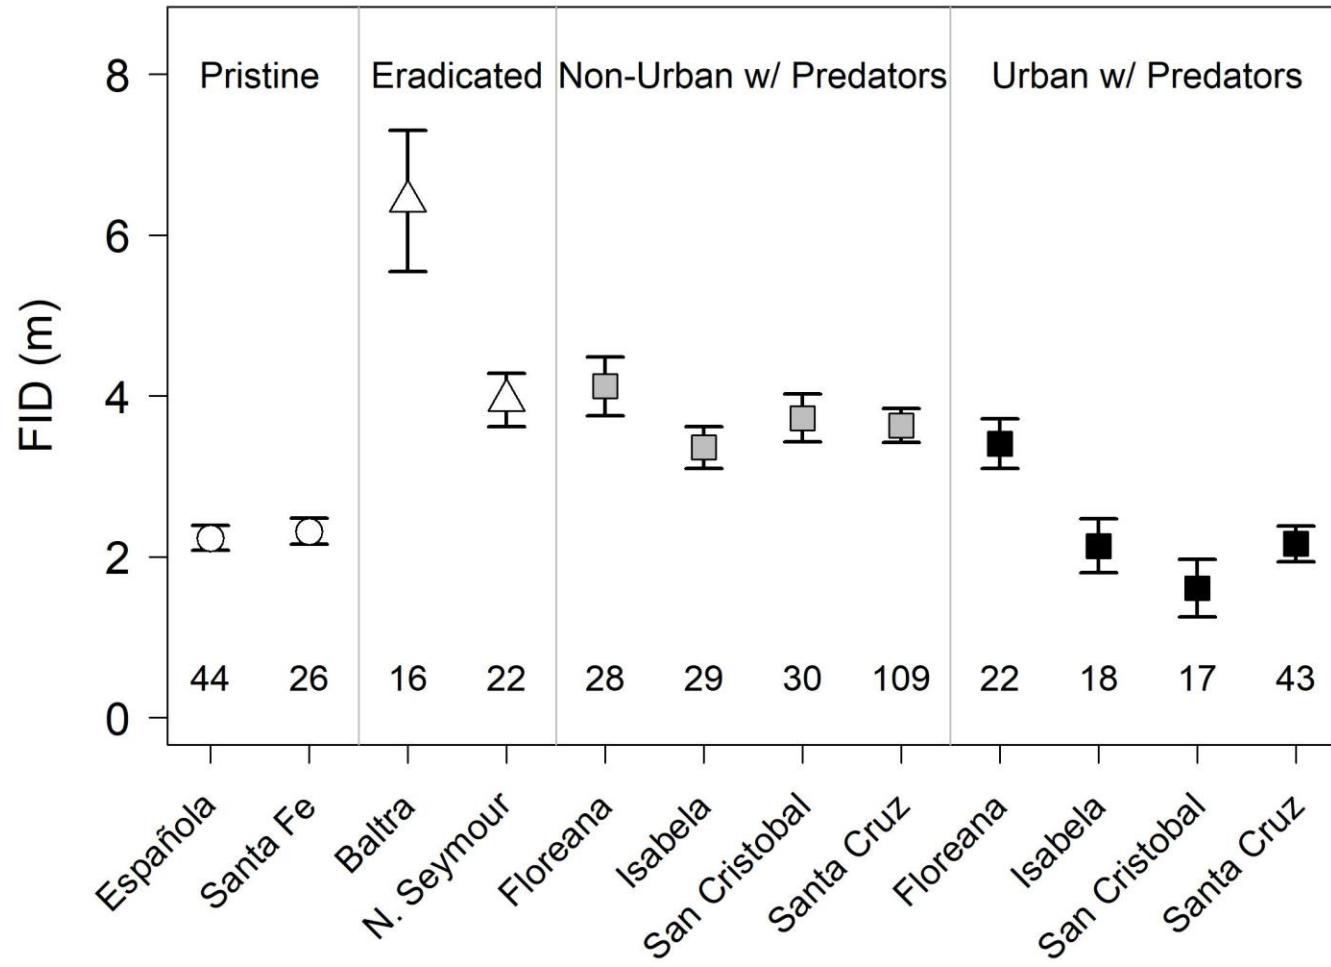

Figure 2.

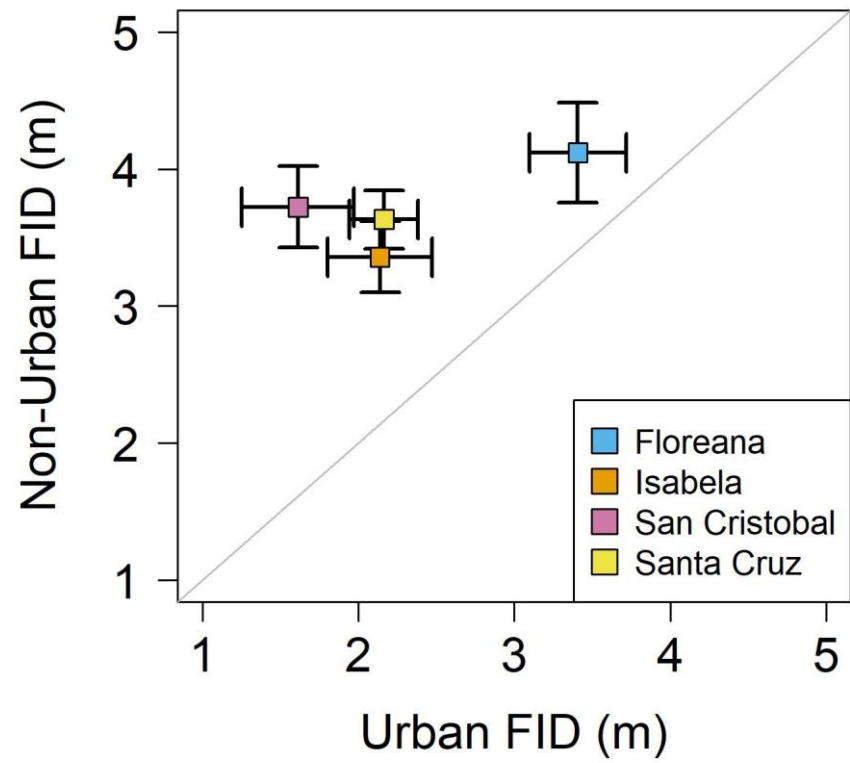

Source: http://biorxiv.org/content/10.1101/591651v2.full.pdf
