## Human influences on antipredator behaviour in Darwin's finches

Kiyoko M. Gotanda<sup>1\*</sup>

<sup>1</sup> Department of Zoology, University of Cambridge, Cambridge, United Kingdom CB2 3EJ

Telephone: +44 (0) 1223-767130, Fax: +44(0) 1223 336676, Email: [kg419@cam.ac.uk](mailto:kg419@cam.ac.uk)

\* Corresponding author

Running Title: Behaviour in Darwin's finches

Keywords: Galapagos, invasive predators, flight initiation distance, urbanization, post-eradication

1 Abstract

2 In the Galapagos, humans have established a permanent presence and have altered selective  
3 pressures on local and endemic species through influences such as invasive predators and  
4 urbanization. I quantified flight initiation distance (FID), an antipredator behaviour in Darwin's  
5 finches, across multiple islands in the Galapagos to address two questions: (i) does antipredator  
6 behaviour change in the presence of invasive predators and importantly, what happens once  
7 invasive predators have been eradicated and (ii) to what degree does urbanization affect  
8 antipredator behaviour? The Galapagos Islands offers a system of among island differences in  
9 invasive predator regime as well as degree of urbanization presenting an opportune place to  
10 answer these two questions. Furthermore, this is one of the first studies to look at behaviour in an  
11 endemic species after successful eradication of invasive predators. FID was higher on islands  
12 with invasive predators as compared to islands with no predators. On islands from which  
13 invasive predators were eradicated ~11 years previously, FID was also higher than on islands  
14 with no invasive predators. Within islands that had both urban and non-urban populations of  
15 finches, FID was lower in urban finch populations, but only above a threshold human population  
16 size. FID in larger urban areas on islands with invasive predators was similar to or *lower* than  
17 FID on islands with no history of invasive predators. Overall, these results suggest that for  
18 antipredator behaviour, invasive predators can have a lasting effect on antipredator behaviour,  
19 even after eradication, and that the effect of urbanization can strongly oppose the effect of  
20 invasive predators, reducing antipredator behaviour to levels lower than found on pristine islands  
21 with no human influences. Together, we can begin to understand how human influences are  
22 affecting antipredator behaviour which could help inform future conservation and management  
23 efforts on islands.

1 "All of [the terrestrial birds] are often approached sufficiently near to be killed with a  
2 switch, and sometimes, as I myself tried, with a cap or a hat." – Charles Darwin in "The Voyage  
3 of the Beagle"

4

## 5 **Introduction**

6 Human influences such as invasive species and urbanization can strongly affect the process of  
7 local adaptation<sup>1-4</sup>. Such effects are amplified on islands such as the Galapagos Islands, where  
8 small population sizes and strong isolation increase the vulnerability of local flora and fauna to  
9 human influences, often resulting in loss of island biodiversity through extinctions<sup>5-8</sup>. Among  
10 the endemic species on the Galapagos Islands are Darwin's finches, an iconic example of an  
11 adaptive radiation in which a single founding species has evolved into several species, each with  
12 different adaptations (e.g. beak shapes and body sizes) to exploit different ecological niches<sup>9,10</sup>.  
13 Humans began establishing settlements on the Galapagos in the early 19<sup>th</sup> century<sup>11</sup>, and since  
14 then, human influences such as invasive predators and urbanization have affected several islands  
15 on the Galapagos. Many organisms initially respond to such human influences through  
16 behavioural adaptations. Here, I consider how two human influences – invasive predators and  
17 urbanization – might alter antipredator behaviour in Darwin's finches on the Galapagos Islands.

18 Invasive predators have strong ecological and evolutionary effects<sup>1,2,12,13</sup>, and this impact  
19 is known to be correlated with local extinction events<sup>14,15</sup>. On islands, the lack of predators and  
20 correlated relaxed selection can result in reduced antipredator behaviour<sup>16-19</sup>. This evolutionary  
21 naïveté of isolated animals that have evolved without major predators can contribute to the  
22 extirpation of island species<sup>17,18,20,21</sup>. In particular, house cats (*Felis silvestris catus*) are of  
23 concern for island biodiversity because cats target small animals such as birds and reptiles<sup>22-25</sup>,

24 and invasive house cats now exist on four islands of the Galapagos <sup>26</sup>, presenting a critical threat  
25 for Galapagos biodiversity <sup>27,28</sup>. Past research on the effects of invasive predators in the  
26 Galapagos has focused on behavioural adaptations in reptiles <sup>e.g., 27,29</sup>, and thus, little is known  
27 about the effect of novel mammalian predators on endemic land birds. Given the resulting  
28 selective pressures, natural selection should favour an increase in antipredator behaviour after the  
29 introduction of an invasive predator to reduce mortality.

30       Effective conservation management, especially on islands, often involve eradication of  
31 invasive predators to protect the local and endemic species <sup>30,31</sup>. Post-eradication research  
32 typically follows local and endemic species population recovery <sup>32-34</sup>, monitors the re-  
33 introduction of extirpated species to previously abandoned breeding grounds <sup>35</sup>, or focus on  
34 major ecological effects such as changes in food web dynamics <sup>32,36</sup>. All this research contributes  
35 to the growing need to understand post-eradication effects <sup>33,34,37</sup>, yet surprisingly little research  
36 has focused on post-eradication behavioural adaptations, nor how quickly such behavioural  
37 adaptations might occur. Post-eradication behavioural adaptations could have population-level  
38 consequences on fitness. For example, increased antipredator behaviour can have associated  
39 costs due to the reallocation of energy and time away from other important behaviours such as  
40 foraging, reproduction, and rearing of young <sup>38-40</sup>, and so if antipredator behaviours are  
41 maintained even after eradication, that might result in a decrease in fitness for local and endemic  
42 species, which could struggle to recover as a result. Thus, understanding how local and endemic  
43 species will behaviourally adapt post-eradication could help improve conservation efforts. On the  
44 Galapagos, some islands have invasive house cats, some have remained free of invasive  
45 predators, and some islands have successfully eradicated invasive predators. This allows for

46 among-island comparisons of antipredator behaviour in relation to the current and historical  
47 invasive-predator regime.

48         Urbanization has rapidly increased in the past century, with more than half the world's  
49 population occupying urban settlements, severely altering patterns of selection and adaptation  
50 <sup>3,4,41</sup>. In general, animals such as birds show decreased antipredator behaviour in urban areas  
51 compared to rural areas, likely due to habituation to humans <sup>42-45</sup>. However, such a reduction in  
52 antipredator behaviour in urban areas could make organisms more vulnerable to different threats,  
53 such as invasive predators. Quantifying the degree to which urbanization can reduce antipredator  
54 behaviours can inform our understanding of the impacts of urbanization. Can urbanization  
55 reduce antipredator behaviour to levels *before* the introduction of predators?

56         The Galapagos Islands represent an excellent opportunity to study the effects on invasive  
57 predators and urbanization for two key reasons that few, if any, other systems offer. First, few  
58 other archipelagos in the world have islands that vary not only in the presence or absence of  
59 invasive predators, but also in whether eradication of invasive predators has been accomplished.  
60 Second, islands differ not only in the presence or absence of urban centres, but also in the size of  
61 the urban centres, representing a novel opportunity to compare antipredator behaviour in urban  
62 and non-urban setting, as well as among islands that have or have not developed urban centres.  
63 The isolation of the Galapagos Islands removes potentially confounding factors such as high  
64 gene flow or continued influxes of introduced predators, allowing me to ask two key questions  
65 regarding human influences and antipredator behaviour. First, I ask how will antipredator change  
66 in the presence of invasive predators and perhaps more importantly, what will happen *after*  
67 eradication of invasive predators from an island? Very little research has been done on  
68 behavioural adaptations post-eradication. Second, I ask how much can urbanization reduce

69 antipredator behaviour – can it be reduced to levels found on islands with no history of invasive  
70 predators? While we know how urbanization can affect behaviour, we have no sense of the  
71 *degree* to which urbanization is affecting behaviour because it is difficult to find a system in  
72 which we can assess baseline behaviour before urbanization occurred (e.g. islands with no  
73 history of permanent human populations). On the Galapagos, islands vary in their exposure to  
74 human influences, allowing me to answer these questions. Together, these two questions can  
75 inform how human influences are affecting antipredator behaviour on isolated islands.

76

## 77 **Materials and methods**

### 78 *Site descriptions*

79 The Galapagos Islands are a volcanic archipelago located ~1,000 km off the coast of Ecuador.  
80 Local or endemic predators such as owls, or snakes are found on all islands (Supplemental Table  
81 1; Swash & Still 2005). Snakes are thought to prey on the nestlings of ground finches, and are  
82 thus an unlikely predator. However, short-eared owls are known predators of adult land birds  
83 such as Darwin’s finches<sup>47</sup>. Galapagos Hawks, also predators of ground finches<sup>48,49</sup>, are found  
84 on four (Santa Fe, Española, Isabela, and Santa Cruz) of the eight islands surveyed in this study  
85<sup>46,50</sup>. Unfortunately, little data are available about the current densities of local and endemic  
86 predators on these islands; however the ecology of the local and endemic predators is well  
87 documented, and can thus be assumed to be predators of finches. The invasive predator regime  
88 (presence of house cats) on the islands (Supplemental Table 1) were classified as: present  
89 (Floreana, Isabela, San Cristobal, Santa Cruz), pristine (Santa Fe, Española), or successful  
90 eradication (Baltra, North Seymour). House cats and rodents were successfully eradicated from  
91 Baltra in 2003<sup>26,51</sup>, and rats from North Seymour in 2008<sup>52,53</sup>; I will refer to these as

92 “eradicated” below for brevity. The two pristine islands and two eradicated islands have no  
93 permanent human populations. On the four islands with human populations (Floreana, Isabela,  
94 San Cristobal, Santa Cruz), site urbanization categories were classified as: urban (in town) or  
95 non-urban (remote areas several kilometres away from town and not visited by tourists). Islands  
96 with permanent human populations and no presence of invasive predators nor pristine islands  
97 with permanent human populations exist in the Galapagos archipelago, and thus, I am restricted  
98 to the among island comparisons outlined above.

99

#### 100 *Data collection*

101 Flight initiation distance (FID), the distance at which a prey flees an approaching  
102 predator, is a metric used to quantify antipredator behaviour<sup>38-40</sup>. An individual’s decision to  
103 flee is influenced by the perceived costs and benefits of remaining or taking flight, which means  
104 FID can be an indicator of how an organism assesses risk, and thus, antipredator behaviour. Data  
105 were collected from 2015 to 2018 on eight islands of the Galapagos archipelago, generally  
106 between February and April (some data on San Cristobal were collected in November 2017).

107 FID measurements were performed with a human stimulus following methods from  
108 Blumstein<sup>54</sup>. A focal finch was located by walking and searching the landscape at a slow  
109 walking pace, and the finch’s initial behaviour was noted. To minimize the possibility of  
110 pseudoreplication, in a given day, each trial ensured the focal finch was of a different sex,  
111 species, or age class (for male *Geospiza spp.*) than finches that had previously been approached.  
112 However, it is possible the same bird might have been approached on different days or years  
113 because the finches were not individually banded. Birds were located in areas that had relatively  
114 open habitat to ensure a straight approach by the human and a clear sightline from the human to

115 the finch. The human would then approach the focal finch at a standardized speed (~2 m/s).  
116 Human stimuli always wore neutral-coloured clothing, and looked at the focal individual while  
117 approaching.

118 Flight was considered to have been initiated if the finch extended its wings and flew; the  
119 distance flown could be short (<0.5 m) or substantial (out of sight). Finches that hopped away  
120 instead of taking flight were omitted from the study, though this was a rare occurrence. A marker  
121 was placed where the finch originally was and where the stimulus was when the finch took  
122 flight, and the distance between these markers was the FID. Because of the complexity of the  
123 landscape, the distance at which the stimulus started from could not be standardized<sup>54-56</sup>, and so  
124 I noted the distance from where the human started to the flight-initiation marker (starting  
125 distance). Alert distance, the distance at which an individual is aware of the approaching  
126 stimulus<sup>57</sup>, could not be quantified because the focal individual was often foraging on the  
127 ground and would repeatedly raise its head, and so normal foraging behaviour was  
128 indistinguishable from an alert reaction to an approaching human.

129 Each data point collected included the island, invasive predator regime, urbanization  
130 category (on islands with permanent human populations), finch species and sex, time of day, and  
131 group size (was the focal finch in a group and if so, how large was the group). Finch sex was  
132 identified by plumage, and for ambiguous cases and non-sexually dimorphic species (e.g.  
133 warbler finches), sex was denoted as unknown. Time of day was noted because birds are most  
134 active at dawn and at dusk, so baseline activity levels and behaviours can vary throughout the  
135 day. Group size was noted because it could increase FID because larger groups mean more  
136 observers and thus, detection of a potential threat will occur when the threat is still a longer  
137 distance away<sup>38</sup>. Conversely, group size could decrease FID through the dilution effect where



138 the probability a predator will target a specific individual decreases as group size increases <sup>40</sup>.  
139 Island size was also noted <sup>58</sup> to account for potential among island environmental differences due  
140 to different area.

141

#### 142 *Statistical analysis*

143 All analyses were done in R (version 3.4.3). To meet assumptions of normal distributions, FID  
144 and starting distance (the distance between the focal finch and the stimulus starting position)  
145 were log-transformed. Then, FID and starting distance were centred by subtracting the mean  
146 from each value and then dividing by the standard deviation. Because starting distance could not  
147 be standardized and is known to affect FID, it was included as a covariate, as was group size,  
148 time of day, and island size. Lastly, sex was included as a fixed effect and species was included  
149 as a random effect. Sample sizes for some species across islands were unbalanced (Supplemental  
150 Table 2); therefore, I also repeated all analyses using one species, *Geospiza fuliginosa*. Further  
151 analysis details are below, but in general, linear mixed models were performed using lmer() from  
152 the lme4 package <sup>59</sup> and Anova() from the car package <sup>60</sup>. Random-effect significance (species  
153 and/or island) was determined with ranova(), and post-hoc pairwise comparisons for fixed  
154 factors in the linear mixed models used diffIsmeans(), both from the lmerTest package <sup>61</sup>. R<sup>2</sup>  
155 values were calculated with the r.squaredGLMM() from the MuMIn package (version 1.42.1).

156 *How does antipredator change in the presence of invasive predators and what happens following*  
157 *eradication of invasive predators from an island?*

158 On islands that had both urban and non-urban populations, only data from non-urban sites  
159 were used for this analysis. A linear mixed model was performed with invasive-predator regime  
160 as a fixed factor, island and species as random factors, and time of day, starting distance, island

161 size, and group size as covariates; post-hoc comparisons focused on pairwise comparisons  
162 between invasive-predator regimes. This analysis were performed twice, once with all finch  
163 species, and once with only small ground finches, *Geospiza fuliginosa*. To determine whether  
164 FID varied among islands within a given invasive-predator regime, I ran a linear mixed model  
165 with island as a fixed factor, species as a random factor, and time of day, starting distance, and  
166 group size as covariates; post-hoc comparisons were focused on pairwise comparisons between  
167 islands within a given invasive-predator regime. This analysis was repeated as a linear model  
168 with only small ground finches, *Geospiza fuliginosa*. For this analysis, post-hoc analyses were a  
169 Tukey's HSD (honestly significant difference) test.

170 *How much can urbanization reduce antipredator behaviour?*

171 Only data collected from the four islands with permanent populations were used for this analysis.  
172 A linear mixed model was performed with site urbanization as a fixed factor, island and species  
173 as random factors, and starting distance and group size as covariates. These analyses were  
174 performed twice, once with all finch species, and once with only small ground finches *Geospiza*  
175 *fuliginosa*.

176

## 177 **Results**

178 *How does antipredator change in the presence of invasive predators and what happens following*  
179 *eradication of invasive predators from an island?*

180 On islands with invasive predators and islands where predators have been eradicated, FID  
181 was significantly higher than on pristine islands (Table 1, Figure 1). Post-hoc comparisons  
182 showed that pristine islands (Santa Fe and Española) had marginally non-significant decreased  
183 FID when compared to islands with invasive predators (Figure 1;  $p = 0.063$ ) and eradicated

184 islands (Figure 1;  $p = 0.014$ ), and eradicated islands did not differ in FID when compared to  
185 island with invasive predators (Figure 1,  $p = 0.192$ ). As group size increased, FID increased  
186 (Table 1, Supplemental Figure 1). Analysis with data only for small ground finches had  
187 comparable results with the only differences being group size was no longer significantly  
188 correlated with FID (Table 1) and a post-hoc comparison of FID from islands with invasive  
189 predators was significantly lower than pristine islands ( $p = 0.017$ ). When considering the effect  
190 of island independently of invasive predator regime, island and group size had a significant  
191 effect on FID (Figure 1; Table 2). Post-hoc comparisons within an invasive predator regime  
192 showed no significant difference between the two pristine islands ( $p = 0.293$ ), among the four  
193 islands with invasive predators ( $0.101 < p < 0.780$ ) with exception of Floreana having  
194 significantly lower FID than Santa Cruz ( $p = 0.011$ ), and between the two eradicated islands,  
195 Baltra had significantly higher FID than North Seymour ( $p = 0.010$ ) Analysis with data only for  
196 small ground finches had comparable results with the only differences being group size was no  
197 longer significantly correlated with FID (Table 2) and a post-hoc comparison of FID of islands  
198 within a predation regime found Baltra did not significantly differ from North Seymour ( $p =$   
199  $0.996$ ) and Floreana did not differ significantly from Santa Cruz ( $p = 0.544$ ).

#### 200 *How much can urbanization reduce antipredator behaviour?*

201 Urban finches had significantly lower FID as compared to non-urban finches (Table 3, Figs. 1  
202 and 2). A post-hoc linear mixed model of FID on Floreana only showed no significant difference  
203 of FID between urban and non-urban populations ( $\chi^2 = 0.030$ ,  $p = 0.862$ ) whereas FID was  
204 significantly lower in urban areas as compared to non-urban areas on Isabela ( $\chi^2 = 16.503$ ,  $p <$   
205  $0.001$ ), San Cristobal ( $\chi^2 = 22.100$ ,  $p < 0.001$ ), and Santa Cruz ( $\chi^2 = 9.185$ ,  $p = 0.002$ ). On San  
206 Cristobal, finches in urban populations had lower FID than found on pristine islands (Figure 1).

207 Group size was again positively correlated with FID (Table 3, Supplemental Figure 1). Time of  
208 day was also positively correlated with FID (the later in the day it was, the higher the FID; Table  
209 2, Supplemental Figure 2). Analysis with data only for small ground finches had comparable  
210 results (Table 3) with the only differences being time of day and group size no longer had a  
211 significant effect on FID (Table 3).

212

## 213 **Discussion**

### 214 *Increased antipredator behaviour is maintained after eradication of invasive predators*

215 Finches exhibited increased antipredator behaviour on islands with invasive predators (Table 1;  
216 Figure 1). More interestingly, this increased antipredator behaviour was also observed on islands  
217 where invasive predators had been eradicated (in 2003 and 2008, 13 and 8 years prior to data  
218 collection; the mean generation time of finches is one year, by comparison). Since all islands  
219 have naturally occurring local or endemic predators of finches (Supplemental Table 1), this  
220 effect was most likely due to the presence of invasive predators, even after eradication. This is  
221 one of the first studies to show that increased antipredator behaviour has been maintained on  
222 islands that have had invasive predators removed. Several possible reasons exist for these  
223 observations, especially the apparent maintenance of elevated FID on eradicated islands. First, it  
224 is possible increased antipredator behaviour has evolved on islands that have and used to have  
225 invasive predators. However, without knowledge of heritability, and thus actual evolution, this  
226 cannot be confirmed, but would be an area for future research. Second, perhaps the expected  
227 costs of increased antipredator behaviour are not high enough to cause a reversion to pre-  
228 predator levels. Increased FID can have associated costs<sup>38-40</sup>, suggesting that if this behavioural  
229 adaptation were costly then finches on eradicated islands would have FID comparable to finches

230 on pristine islands. It could also be that not enough time has elapsed for reversion in antipredator  
231 behaviour. Third cultural transmission of increased FID<sup>62,63</sup> with learned behaviour transmitted  
232 from generation to generation could maintain the increased FID. Lastly, the increase in FID  
233 could be due to something other than predation, which could still be present on eradicated  
234 islands, or that for unknown historical reasons, antipredator behaviour on the eradicated islands  
235 have historically been high. The last reason is possible, but it would be a quite a coincidence if  
236 the eradicated islands that have this elevated FID for some reason unrelated to predation just  
237 happen to be exactly the islands where predation was introduced and then eradicated.

238         Regardless of the mechanism, the fact that antipredator behaviour levels did not revert  
239 post-eradication (when comparing FID on eradicated islands to FID on pristine islands; Figure 1)  
240 has potential consequences for evaluating the efficacy of eradication efforts. Recent studies of  
241 local animal populations post-eradication have focussed on demographic parameters such as  
242 population recovery<sup>32-34</sup> or on ecological parameters such as food-web dynamics<sup>32,36</sup>. However,  
243 such phenomena will be influenced by behavioural shifts. For example, increased antipredator  
244 behaviour correlates with decreased time and energy for behaviours such as foraging, courting,  
245 defending territories, or caring for offspring<sup>38-40</sup>, which could affect population recovery and/or  
246 food-web dynamics. Thus, understanding how the eradication of invasive predators will affect  
247 the behaviour of local or endemic animals should be central to future conservation efforts<sup>33,34,37</sup>.

248 *Urbanization can decrease antipredator behaviour to levels lower than before the introduction*  
249 *of predators*

250 Finches in urban areas had lower FID than finches in non-urban areas, supporting previous  
251 findings<sup>42-45</sup>. However, two interesting wrinkles are found in this general trend. First, the *degree*  
252 of urbanization appears to determine just how much lower FID is for urban finches when

253 compared to non-urban finches. Finches in the town of Puerto Velasco Ibarra on Floreana had  
254 the highest FID compared to finches in other towns, and Puerto Velasco Ibarra is also the  
255 smallest town, with a permanent population of only 111 (Supplemental Table 1). The  
256 significantly lower FID of finches in larger towns as compared to non-urban finches suggests an  
257 urbanization “threshold”, such that the degree of urbanization needs to be high enough to exert  
258 sufficient selective pressure on finches to drive behavioural adaptation; in short, perhaps Puerto  
259 Velasco Ibarra is simply too small to be an “urban” site for the purposes of finch behavioural  
260 adaptation. The next largest town, Puerto Villamil on Isabela, with a population of 2,164  
261 (Supplemental Table 1), had significantly lower FID than Puerto Velasco Ibarra on Floreana.  
262 Puerto Villamil is still a relatively small town (Supplemental Table 1), showing that the  
263 threshold amount of urbanization sufficient to produce differences in antipredator behaviour is  
264 not very high.

265         The second interesting wrinkle is that on some islands, urbanization can result in FID that  
266 is *lower* than FID on islands that have never been exposed to predators (Figure 1), even though  
267 urban areas invariably contain invasive predators such as cats and rats. In other words, in some  
268 towns, such as Puerto Baquizo Moreno on San Cristobal, FID has been reduced to levels below  
269 what was observed on islands with no history of invasive predators. Such reductions in FID in  
270 urban finches is likely due to habituation<sup>64-67</sup>, ) suggesting that habituation from urbanization is  
271 so strong that it results in FID lower than the baseline FID quantified on pristine islands,  
272 counteracting any increase in FID due to the presence of invasive predators. This suggests that  
273 the effects of urbanization on organisms can be quite strong, with likely evolutionary and  
274 ecological consequences<sup>3,4,68</sup>.

275 *Group size and species*

276 For all analyses with all species, FID significantly increased with increasing finch group  
277 size (Supplemental Figure 1). This supports the “many-eyes hypothesis” that detection of  
278 predators occurs earlier in large groups, when the predator is further away, due to the larger  
279 number of individuals watching<sup>38</sup>. Because of the unbalanced design with respect to sample  
280 sizes of different species on different islands, and because Darwin’s finches are closely related  
281 species (implying statistical non-independence among species), I repeated all analyses with a  
282 subset of the data utilizing FID from the one species, the Small Ground Finch, *Geospiza*  
283 *fuliginosa*. Species did not have a significant effect on FID in any of the main analyses, and these  
284 additional single-species results did not alter the interpretation of any of my results. Future work  
285 should use a more balanced sample size and to allow adjustment for non-independence among  
286 species.

### 287 *Conclusions*

288 Our current understanding of how humans affect the evolution and ecology of Darwin’s finches  
289 has primarily focused on beak shape evolution and shifts in ecological niches in response to  
290 changes in food availability and diet<sup>69–71</sup>. However, humans have had effects on the environment  
291 of the Galapagos beyond diet, through creation of urban environments and the introduction of  
292 invasive mammalian predators. The Galapagos Islands represent an opportune system to study  
293 the effects of human influences due to the among island differences in invasive predator regime  
294 as well as the differences in the amount of urbanization. Such systems do not readily exist  
295 elsewhere. Here, I showed how antipredator behaviour increased in response to invasive  
296 predators and was maintained even after eradication of those invasive predators, and this can  
297 have possible demographic and ecological effects. This is one of the first studies to look at post-  
298 eradication behaviours in local and endemic species, which can have implications for future

299 conservation efforts. I also found that urbanization can reduce antipredator behaviour to levels at  
300 or below what was found on pristine islands, attesting to the strength of the effect urbanization  
301 can have on behavioural traits. Understanding the effects of different human influences will help  
302 us predict how organisms might respond to their rapidly changing environments.

303

#### 304 **Acknowledgements**

305 I wish to thank Marc-Olivier Beausoleil, Lara Bernasconi, Carlos Camacho, Sofia Carvajal,  
306 Angela Hansen, Céline Leuba, and Ashley Saulsberry for their assistance in the field. Permits  
307 were obtained with the assistance of Sofia Carvajal, Jaime Chaves, Jeff Podos, the Charles  
308 Darwin Research Centre, the Galápagos Science Centre, the Galápagos National Park, and the  
309 Universidad de San Francisco. I thank Sarah Knutie for numerous helpful suggestions on ideas  
310 and methods, Ben Haller, Andrew Hendry, and Claire Spottiswoode for extensive comments and  
311 friendly reviews of the manuscript, and Tom Houslay for guidance with statistics. My research  
312 has been generously supported by the Natural Sciences and Engineering Research Council of  
313 Canada (Banting Postdoctoral Fellowship), Le Fonds Québécois de la Recherche sur la Nature et  
314 les Technologies (postdoctoral research fellowship), Clare Hall (Whitehead Fund), Christ's  
315 College (Galápagos Islands Visiting Scholarship Scheme), Newnham College (Phyllis and  
316 Eileen Gibbs Travelling Research Fellowship), the British Ornithologists' Union, and McGill  
317 University (Department of Biology Vineberg Fellowship). Lastly, many thanks to Andrew  
318 Hendry, Jeff Podos, and Joost Raeymaekers for introducing me to the magical place that  
319 happened to be visited, some 185 years ago, by someone named Charles Darwin.



## References

1. Low, T. *Feral Future: The Untold Story of Australia's Exotic Invaders*. (University of Chicago Press, 2002).
2. Vitousek, P. M., Mooney, H. A., Lubchenco, J. & Melillo, J. M. Human domination of Earth's ecosystems. *Science* **277**, 494–499 (1997).
3. Johnson, M. T. J. & Munshi-South, J. Evolution of life in urban environments. *Science* **358**, eaam8237 (2017).
4. Alberti, M. *et al.* Global urban signatures of phenotypic change in animal and plant populations. *Proc. Natl. Acad. Sci.* **114**, 8651–8956 (2017).
5. Sax, D. F. & Gaines, S. D. Species invasions and extinction: the future of native biodiversity on islands. *Proc. Natl. Acad. Sci.* **105**, 11490–11497 (2008).
6. Blackburn, T. M., Cassey, P., Duncan, R. P., Evans, K. L. & Gaston, K. J. Avian extinction and mammalian introductions on oceanic islands. *Science* **305**, 1955–1958 (2004).
7. Fritts, T. H. & Rodda, G. H. The role of introduced species in the degradation of island ecosystems: a case history of Guam. *Annu. Rev. Ecol. Syst.* **29**, 113–140 (1998).
8. MacArthur, R. H. & Wilson, E. O. *The Theory of Island Biogeography*. (Princeton University Press, 1967).
9. Grant, P. R. & Grant, R. B. *How and Why Species Multiply: The Radiation of Darwin's Finches*. (Princeton University Press, 2008).
10. Grant, P. R. & Grant, R. B. *40 Years of Evolution: Darwin's Finches on Daphne Major Island*. (Princeton University Press, 2014).
11. Fitter, J., Fitter, D. & Hosking, D. *Wildlife of the Galápagos*. (Princeton University Press,

- 2016).
12. Clavero, M., Brotons, L., Pons, P. & Sol, D. Prominent role of invasive species in avian biodiversity loss. *Biol. Conserv.* **142**, 2043–2049 (2009).
  13. Lever, C. *Naturalized Animals: The Ecology of Successfully Introduced Species*. (Poyser Natural History, 1994).
  14. McKinney, M. L. & Lockwood, J. L. Biotic homogenization: a few winners replacing many losers in the next mass extinction. *Trends Ecol. Evol.* **14**, 450–453 (1999).
  15. Clavero, M. & García-Berthou, E. Invasive species are a leading cause of animal extinctions. *Trends Ecol. Evol.* **20**, 110 (2005).
  16. Beauchamp, G. Reduced flocking by birds on islands with relaxed predation. *Proc. R. Soc. B Biol. Sci.* **271**, 1039–1042 (2004).
  17. Blumstein, D. T., Daniel, J. C. & Springett, B. P. A test of the multi-predator hypothesis: rapid loss of antipredator behavior after 130 years of isolation. *Ethology* **110**, 919–934 (2004).
  18. Blumstein, D. T. Moving to suburbia: ontogenetic and evolutionary consequences of life on predator-free islands. *J. Biogeogr.* **29**, 685–692 (2002).
  19. Jolly, C. J., Webb, J. K. & Phillips, B. L. The perils of paradise: an endangered species conserved on an island loses antipredator behaviours within 13 generations. *Biol. Lett.* **14**, 20180222 (2018).
  20. Cooper, W. E., Pyron, R. A. & Garland, T. Island tameness: living on islands reduces flight initiation distance. *Proc. R. Soc. B Biol. Sci.* **281**, 20133019 (2014).
  21. Blumstein, D. T. & Daniel, J. C. The loss of anti-predator behaviour following isolation on islands. *Proc. R. Soc. B Biol. Sci.* **272**, 1663–1668 (2005).

22. Loss, S. R., Will, T. & Marra, P. P. The impact of free-ranging domestic cats on wildlife of the United States. *Nat. Commun.* **4**, 2961 (2013).
23. Blancher, P. Estimated number of birds killed by house cats (*Felis catus*) in Canada. *Avian Conserv. Ecol.* **8**, 3 (2013).
24. Woods, M., McDonald, R. A. & Harris, S. Predation of wildlife by domestic cats *Felis catus* in Great Britain. *Mammal Rev. Mammal Rev. Blackwell Sci.* **33**, 174–188 (2003).
25. Woinarski, J. C. Z. *et al.* How many reptiles are killed by cats in Australia? *Wildl. Res.* **45**, 247–266 (2018).
26. Phillips, R. B., Wiedenfeld, D. A. & Snell, H. L. Current status of alien vertebrates in the Galápagos Islands: invasion history, distribution, and potential impacts. *Biol. Invasions* **14**, 461–480 (2012).
27. Stone, P. A., Snell, H. L. & Snell, H. M. Behavioral diversity as biological diversity: introduced cats and lava lizard wariness. *Conserv. Biol.* **8**, 569–573 (1994).
28. Wiedenfeld, D. A. & Jiménez-Uzcátegui. Critical problems for bird conservation in the Galápagos Islands. *Cotinga* **29**, 22–27 (2008).
29. Berger, S., Wikelski, M., Romero, L. M., Kalko, E. K. & Roedl, T. Behavioral and physiological adjustments to new predators in an endemic island species, the Galápagos marine iguana. *Horm. Behav.* **52**, 653–663 (2007).
30. Nogales, M. *et al.* Feral cats and biodiversity conservation: the urgent prioritization of island management. *Bioscience* **63**, 804–810 (2013).
31. Jones, H. P. *et al.* Invasive mammal eradication on islands results in substantial conservation gains. *Proc. Natl. Acad. Sci.* **113**, 4033–4038 (2016).
32. Hughes, B. J., Martin, G. R. & Reynolds, S. J. Cats and seabirds: effects of feral domestic

- cat *Felis silvestris catus* eradication on the population of Sooty Terns *Onychoprion fuscata* on Ascension Island, South Atlantic. *Ibis (Lond. 1859)*. **150**, 122–131 (2008).
33. Lavers, J. L., Wilcox, C. & Donlan, C. J. Bird demographic responses to predator removal programs. *Biol. Invasions* **12**, 3839–3859 (2010).
  34. Côté, I. M. & Sutherland, W. J. The effectiveness of removing predators to protect bird populations. *Conserv. Biol.* **11**, 395–405 (1997).
  35. Campbell, K. J. *et al.* in *Island Invasives: Eradication and Management* (eds. Veitch, C. R., Clout, M. N. & Towns, D. R.) (IUCN and CBB, 2011).
  36. Zavaleta, E. S., Hobbs, R. J. & Mooney, H. A. Viewing invasive species removal in a whole-ecosystem context. *Trends Ecol. Evol.* **16**, 454–459 (2001).
  37. Phillips, R. A. Eradications of invasive mammals from islands: Why, where, how and what next? *Emu* **110**, (2010).
  38. Ydenberg, R. C. & Dill, L. M. The economics of fleeing from predators. *Adv. Study Behav.* **16**, 229–249 (1986).
  39. Cooper, W. E. & Frederick, W. G. Optimal flight initiation distance. *J. Theor. Biol.* **244**, 59–67 (2007).
  40. *Escaping From Predators: An Integrative View of Escape Decisions*. (Cambridge University Press, 2015).
  41. Hendry, A. P., Gotanda, K. M. & Svensson, E. I. Human influences on evolution, and the ecological and societal consequences. *Philos. Trans. R. Soc. B* **372**, 20160028 (2017).
  42. Díaz, M. *et al.* The geography of fear: a latitudinal gradient in anti-predator escape distances of birds across Europe. *PLoS One* **8**, e64634 (2013).
  43. Samia, D. S. M. *et al.* Rural-urban differences in escape behavior of European birds across

- a latitudinal gradient. *Front. Ecol. Evol.* **5**, 1–13 (2017).
44. Møller, A. P. & Tryjanowski, P. Direction of approach by predators and flight initiation distance of urban and rural populations of birds. *Behav. Ecol.* **25**, 960–966 (2014).
  45. Møller, A. P. Successful city dwellers: a comparative study of the ecological characteristics of urban birds in the Western Palearctic. *Oecologia* **159**, 849–858 (2009).
  46. Swash, A. & Still, R. *Birds, Mammals, and Reptiles of the Galápagos Islands - An Identification Guide*. (Yale University Press, 2005).
  47. Groot, R. S. D. E. Origin, status and ecology of the owls in Galapagos. *Ardea* **71**, 167–182 (1982).
  48. Vries, T. De. Prey selection and hunting methods of the Galapagos Hawk, *Buteo galapagoensis*. *Le Gerfaut* **66**, 3–43 (1976).
  49. Vries, T. De. *The Galapagos Hawk/El gavilán de Galápagos*. (Tundra Ediciones, 2015).
  50. Vries, T. De. in *Raptors in the Modern World* (eds. Meyburg, B.-U. & Chancellor, R. D.) 327–330 (WWGBP, 1989).
  51. Phillips, R. B. *et al.* Eradicating feral cats to protect Galapagos Land Iguanas: methods and strategies. *Pacific Conserv. Biol.* **11**, 257–267 (2005).
  52. Harper, G. A. & Carrión, V. in *Island Invasives: Eradication and Management* (eds. Veitch, C. R., Clout, M. N. & Towns, D. R.) 63–66 (IUCN, 2011).
  53. Carrión, V., Sevilla, C. & Tapia, W. Management of introduced animals in Galapagos. *Galapagos Res.* **65**, 46–48 (2008).
  54. Blumstein, D. T. Developing an evolutionary ecology of fear: how life history and natural history traits affect disturbance tolerance in birds. *Anim. Behav.* **71**, 389–399 (2006).
  55. Blumstein, D. T. Flight-initiation distance in birds is dependent on intruder starting

- distance. *J. Wildl. Manage.* **67**, 852–857 (2003).
56. Samia, D. S. M., Nomura, F. & Blumstein, D. T. Do animals generally flush early and avoid the rush? A meta-analysis. *Biol. Lett.* **9**, 20130016–20130016 (2013).
  57. Cooper, W. E., Samia, D. S. M. & Blumstein, D. T. in *Advances in the Study of Behavior* **47**, 147–197 (2015).
  58. Jackson, M. H. *Galapagos*. (The University of Calgary Press, 1991).
  59. Bates, D. M., Maechler, M., Bolker, B. M. & Walker, S. Fitting linear mixed-effects models using lme4. *J. Stat. Softw.* **67**, 1–48 (2015).
  60. Fox, J. & Weisberg, S. *An {R} Companion to Applied Regression*. (Sage, 2011).
  61. Kuznetsova, A., Brockhoff, P. B. & Christensen, R. H. B. lmerTest package: tests in linear mixed effects models. *J. Stat. Softw.* **82**, 1–26 (2017).
  62. Aplin, L. M. Culture and cultural evolution in birds: a review of the evidence. *Anim. Behav.* (2018). doi:10.1016/j.anbehav.2018.05.001
  63. Aplin, L. M. *et al.* Experimentally induced innovations lead to persistent culture via conformity in wild birds. *Nature* **518**, 538–541 (2015).
  64. Cavalli, M., Baladrón, A. V., Isacch, J. P., Biondi, L. M. & Bó, M. S. The role of habituation in the adjustment to urban life: An experimental approach with burrowing owls. *Behav. Processes* **157**, 250–255 (2018).
  65. Møller, A. P. Flight distance of urban birds, predation, and selection for urban life. *Behav. Ecol. Sociobiol.* **63**, 63–75 (2008).
  66. Samia, D. S. M., Nakagawa, S., Nomura, F., Rangel, T. F. & Blumstein, D. T. Increased tolerance to humans among disturbed wildlife. *Nat. Commun.* **6**, 1–8 (2016).
  67. Blumstein, D. T., Fernandez-Juricic, E., Zollner, P. A. & Garity, S. C. Inter-specific

- variation in avian responses to human disturbance. *J. Appl. Ecol.* **42**, 943–953 (2005).
68. Alberti, M. Eco-evolutionary dynamics in an urbanizing planet. *Trends Ecol. Evol.* **30**, 114–126 (2015).
69. De León, L. F. *et al.* Urbanization erodes niche segregation in Darwin’s finches. *Evol. Appl.* 1–15 (2018). doi:10.1111/eva.12721
70. De León, L. F. *et al.* Exploring possible human influences on the evolution of Darwin’s finches. *Evolution* **65**, 2258–2272 (2011).
71. Hendry, A. P. *et al.* Possible human impacts on adaptive radiation: beak size bimodality in Darwin’s finches. *Proc. R. Soc. B Biol. Sci.* **273**, 1887–1894 (2006).

Table 1. Results for the first question: does antipredator vary in relation to invasive predator regime (present, pristine, or eradicated)? A general linear mixed model was performed with FID as the dependent variable, invasive predator regime and sex as fixed factors, time of day, starting distance, and group size as covariates, and species and island as random factors.  $R^2$  for full model with all species was 0.281. This analysis was repeated using only small ground finches. Data used for this analysis were from eight islands that varied in invasive predator regime. For data collected on islands with permanent human populations, only data from non-urban sites used here. Bold indicates significant P values.

|                           |                 | $\chi^2$ | d.f. | P                |
|---------------------------|-----------------|----------|------|------------------|
| All finches               | Predation       | 13.797   | 2    | <b>0.001</b>     |
|                           | Sex             | 2.416    | 2    | 0.299            |
|                           | Time of Day     | 1.683    | 1    | 0.164            |
|                           | Start Distance  | 0.340    | 1    | 0.560            |
|                           | Group Size      | 18.166   | 1    | <b>&lt;0.001</b> |
|                           | Island Size     | 0.152    | 1    | 0.697            |
|                           | Predation * Sex | 0.849    | 3    | 0.838            |
|                           | Species         | 0.000    | 1    | 1.000            |
|                           | Island          | 5.209    | 1    | <b>0.022</b>     |
| Small ground finches only | Predation       | 12.370   | 2    | <b>0.002</b>     |
|                           | Sex             | 4.034    | 2    | 0.133            |
|                           | Time of Day     | 1.444    | 1    | 0.229            |
|                           | Start Distance  | 0.021    | 1    | 0.886            |
|                           | Group Size      | 1.551    | 1    | 0.213            |
|                           | Island Size     | 0.320    | 1    | 0.572            |
|                           | Predation * Sex | 1.527    | 2    | 0.466            |
|                           | Island          | 0.2025   | 1    | 0.653            |



Table 2. Results looking at the effect of islands on FID. A linear mixed model was performed with FID as the dependent variable, island and sex as fixed factors, species as a random factor, and time of day, starting distance, and group size as covariates.  $R^2$  for full model with all species was 0.269. This analysis was repeated as a linear model with only small ground finches Data used for this analysis were from eight islands that varied in invasive predator regime. On islands with human populations, only data from non-urban sites are included. Bold indicates significant P values.

|                           |                | $\chi^2$ | d.f. | P                |
|---------------------------|----------------|----------|------|------------------|
| All finches               | Island         | 39.287   | 7    | <b>&lt;0.001</b> |
|                           | Sex            | 0.310    | 2    | 0.856            |
|                           | Time of Day    | 2.930    | 1    | 0.087            |
|                           | Start Distance | 0.367    | 1    | 0.545            |
|                           | Group Size     | 17.291   | 1    | <b>&lt;0.001</b> |
|                           | Island * Sex   | 5.358    | 10   | 0.866            |
|                           | Species        | 0.023    | 1    | 0.880            |
|                           |                |          | F    | d.f.             |
| Small ground finches only | Island         | 3.587    | 7    | <b>0.001</b>     |
|                           | Sex            | 1.677    | 2    | 0.191            |
|                           | Time of Day    | 1.693    | 1    | 0.195            |
|                           | Start Distance | 0.112    | 1    | 0.739            |
|                           | Group Size     | 1.850    | 1    | 0.176            |
|                           | Island * Sex   | 0.604    | 7    | 0.752            |

Table 3. Results from the second question asking if urbanization affects antipredator behaviour A general linear mixed model was performed with FID as the dependent variable, site urbanization category and sex as fixed factors, time of day, starting distance, and group size as covariates, and species and island as random factors.  $R^2$  for full model was 0.275. This analysis was repeated using only small ground finches. Data used in this analysis were from urban and non-urban sites on the four islands with permanent human populations. Bold indicates significant P values.

|                           |                     | $\chi^2$ | d.f.  | P                |
|---------------------------|---------------------|----------|-------|------------------|
| All finches               | Site Category       | 44.890   | 1     | <b>&lt;0.001</b> |
|                           | Sex                 | 0.482    | 2     | 0.786            |
|                           | Time of Day         | 11.650   | 1     | <b>&lt;0.001</b> |
|                           | Starting Distance   | 0.450    | 1     | 0.502            |
|                           | Group Size          | 13.165   | 1     | <b>&lt;0.001</b> |
|                           | Island Size         | 0.687    | 1     | 0.407            |
|                           | Site Category * Sex | 0.416    | 1     | 0.518            |
|                           | Species             | 0.000    | 1     | 1.000            |
|                           | Island              | 3.684    | 1     | 0.055            |
| Only small ground finches | Site Category       | 14.456   | 1     | <b>&lt;0.001</b> |
|                           | Sex                 | 0.911    | 1     | 0.340            |
|                           | Time of Day         | 2.252    | 1     | 0.133            |
|                           | Starting Distance   | 1.987    | 1     | 0.159            |
|                           | Group Size          | 5.015    | 1     | 0.025            |
|                           | Island Size         | 0.199    | 1     | 0.655            |
|                           | Site Category * Sex | 1.178    | 1     | 0.278            |
| Island                    | 1.928               | 1        | 0.165 |                  |

## Figure Legends

Figure 1. Mean FID and standard error on the eight islands data were collected from. Symbol shape denotes the invasive predator regime (pristine, eradicated, or present). Island and site categorization are listed on the top, and numbers indicate sample sizes. Symbol colour indicates the site urbanization category on the four islands with permanent human populations and invasive predators (Floreana, Isabela, San Cristobal, and Santa Cruz). Gray colour indicates non-urban finches, and black indicates urban finches. Open symbols indicate islands with no permanent human populations. The two far left islands, Española and Santa Fe are pristine islands with no history of invasive predators. The next two islands, Baltra and North Seymour are where invasive predators have been successfully eradicated in 2003 and 2008 respectively, and show maintained increased antipredator behaviour. Islands with predators are ordered by population size with Floreana having the smallest urban population and Santa Cruz the largest urban population. In non-urban sites that have invasive predators, antipredator behaviour is increased, and in non-urban sites, antipredator is significantly decreased on all islands except Floreana. On San Cristobal, the antipredator behaviour is lower than on islands untouched by predators and humans.

Figure 2. Mean FID and standard error contrasting urban finches with non-urban finches from the four islands that have permanent human populations. Colour indicates island. Above the 1:1 line indicates FID in non-urban areas is higher than FID in urban areas. Floreana, the island with the smallest human population size, has the least difference in FID between urban and non-urban finches.

Figure 1.

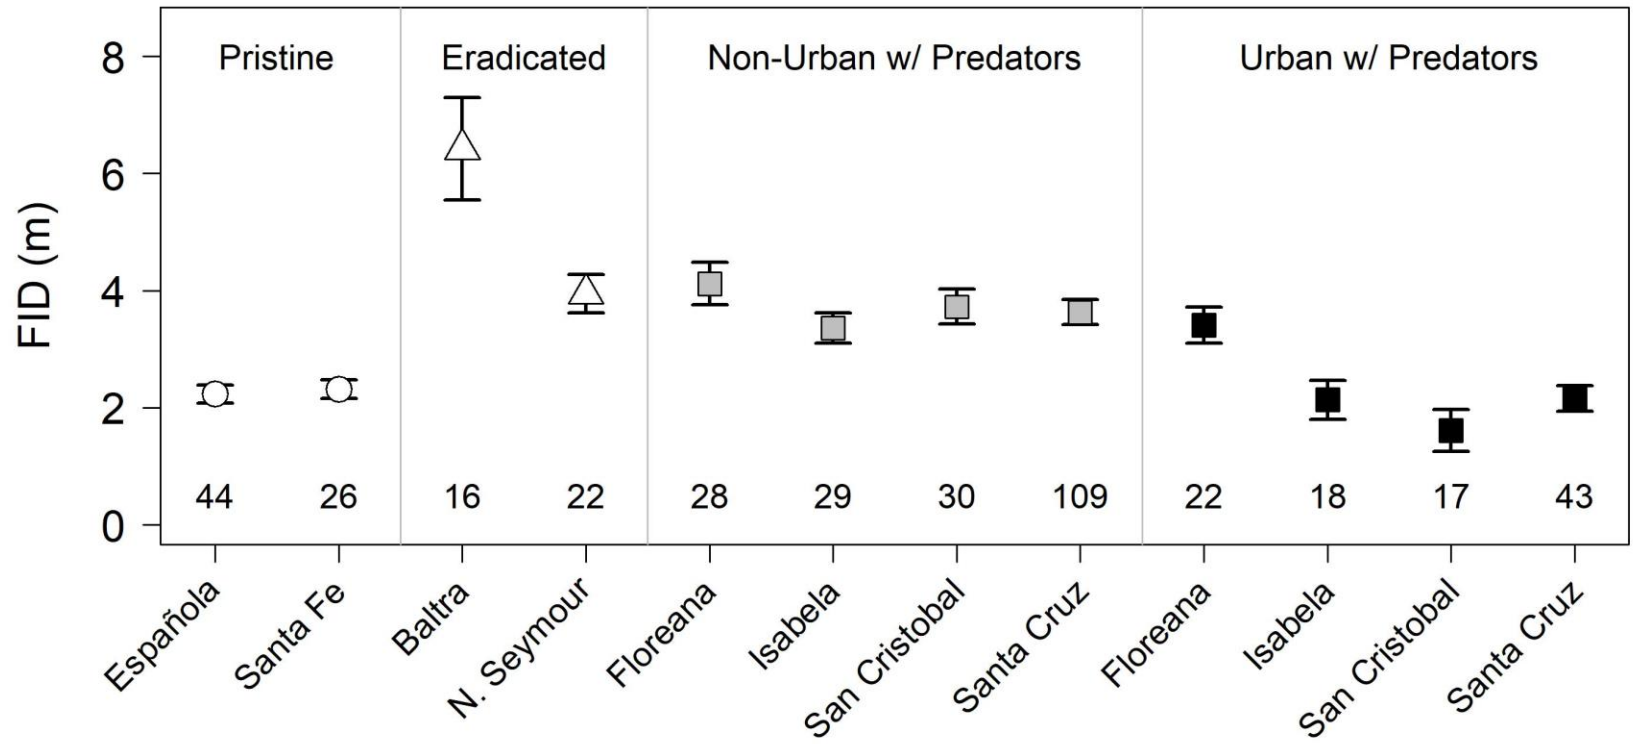

Figure 2.

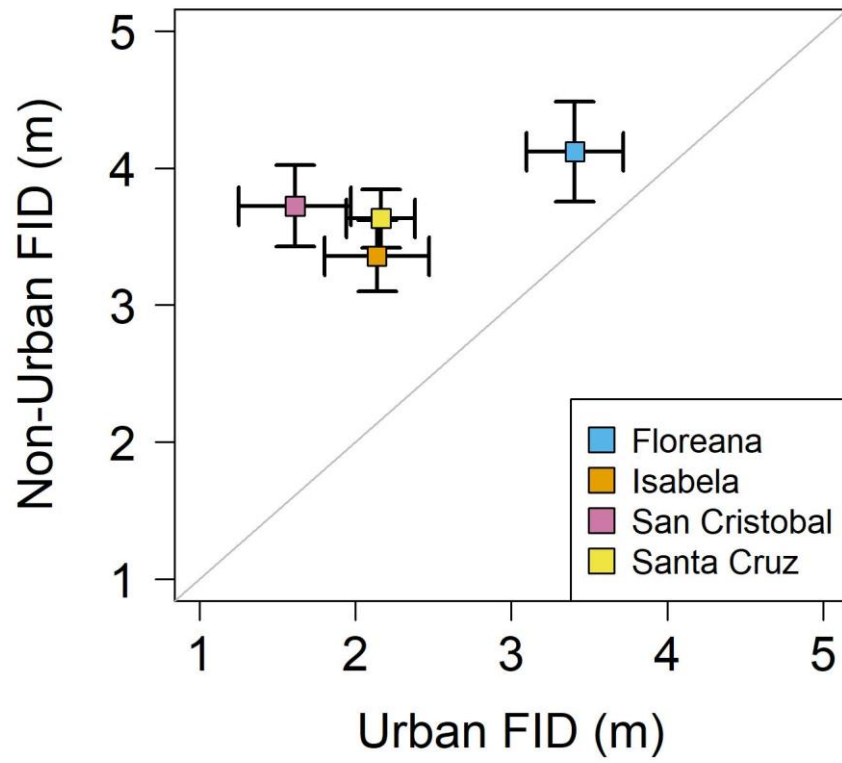

Source: https://www.biorxiv.org/content/10.1101/591651v1.full.pdf
